# Supplementary material for: Bayesian Sequential Modeling of Time-to-Urination for Dynamic ED Triage
Source: Research Square preprint supplement (doi:10.21203/rs.3.rs-8071552/v1), 2025-12-15
Supplement: Supplementary file 1 [file 5effca6e224802041d286045.pdf]

## Supplement 1: Sampling diagnostics (NUTS/HMC)

### S1A — Energy Diagnostics

Hamiltonian Monte Carlo sampling was evaluated using the energy plot , which displays (i) the marginal distribution of the Hamiltonian energy  $E$  and (ii) the distribution of energy transitions  $\Delta E$  between successive proposals. Adequate overlap and dispersion between these two distributions indicate efficient exploration of the typical set. As a scalar summary, we report the energy Bayesian fraction of missing information (E-BFMI); values  $\geq 0.3$  are generally considered adequate, whereas low E-BFMI suggests poor energy exploration and potential pathologies (e.g., sticky trajectories or a need for reparameterization).

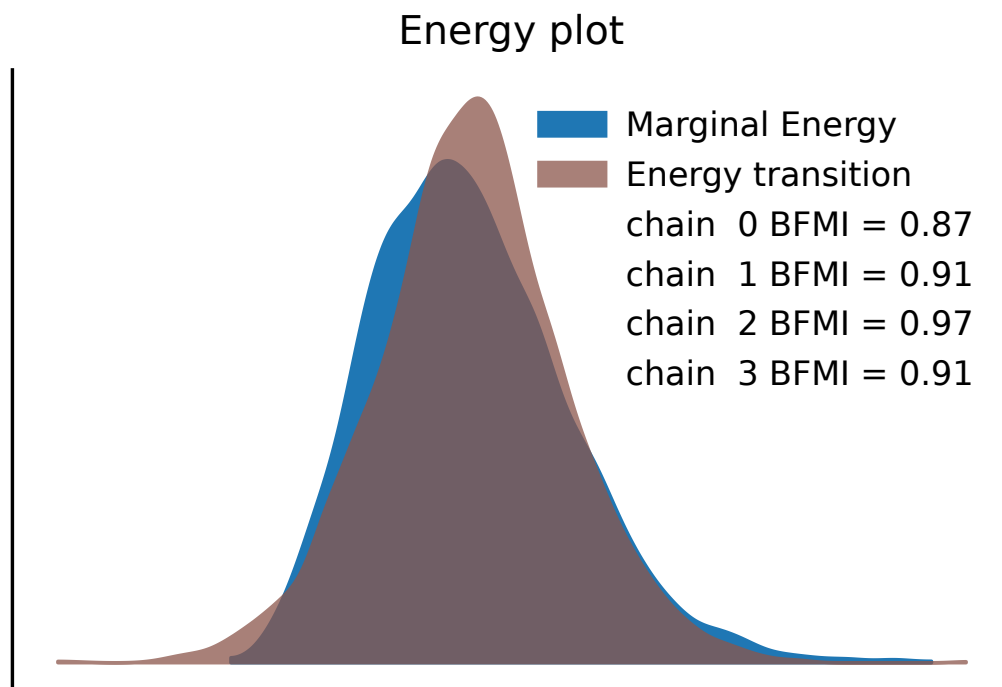

**Figure S1A.** Energy plot with E-BFMI by chain.

## S1B — Trace Diagnostics (By Chain)

We inspected trace plots for representative parameters  $(\rho_0, \rho_1, \mu_0, \mu_1, \sigma_0, \sigma_1, \beta)$  across chains to assess mixing and stationarity under NUTS/HMC. Well-behaved traces demonstrate rapid mixing, “fat-caterpillar” shapes without persistent trends, and stable running means after warm-up. Between-chain overlays were visually indistinguishable, and autocorrelation decayed rapidly, consistent with convergence and adequate effective sample sizes.

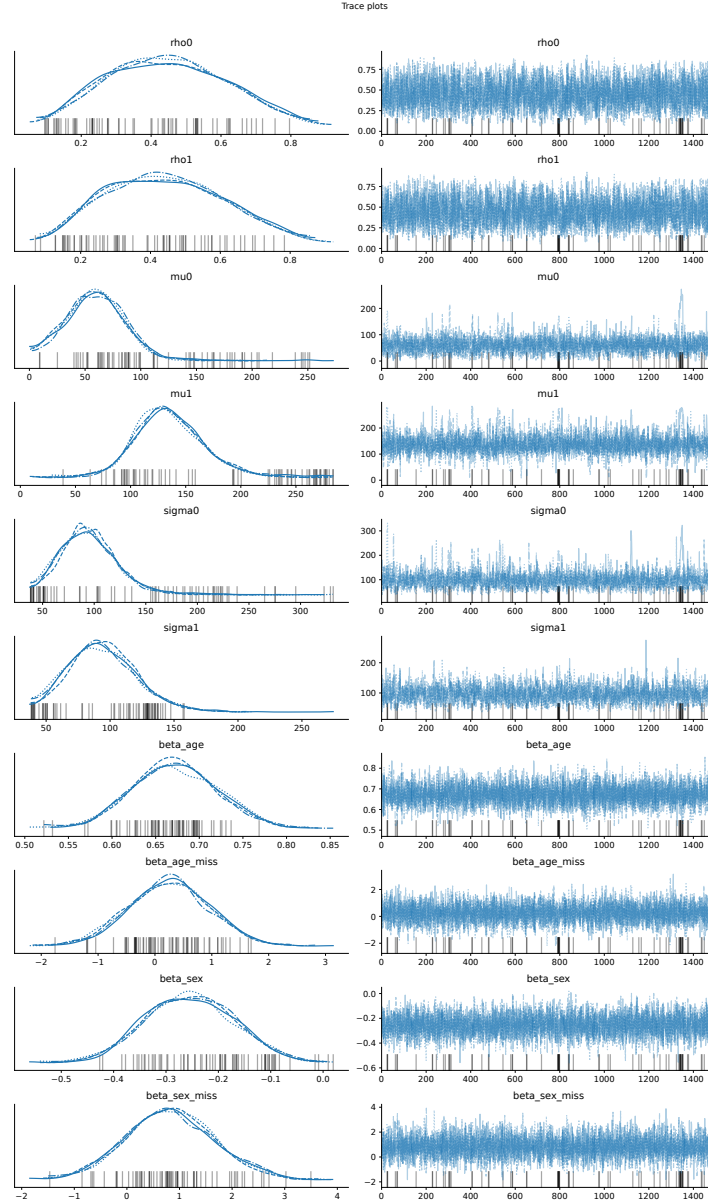

**Figure S1B.** Trace plots by chain with running means and autocorrelation panels.

## S1C —Rank Diagnostics (Uniform Rank Histograms)

Convergence was further evaluated with rank plots (uniform rank histograms). For each parameter, draws from each chain are ranked within the pooled posterior; under good mixing, per-chain rank frequencies are approximately uniform. Systematic deviations (e.g., U- or  $\cap$ -shapes or edge spikes) indicate poor between-chain overlap or adaptation issues. The observed histograms were approximately flat with only random fluctuation, supporting convergence.

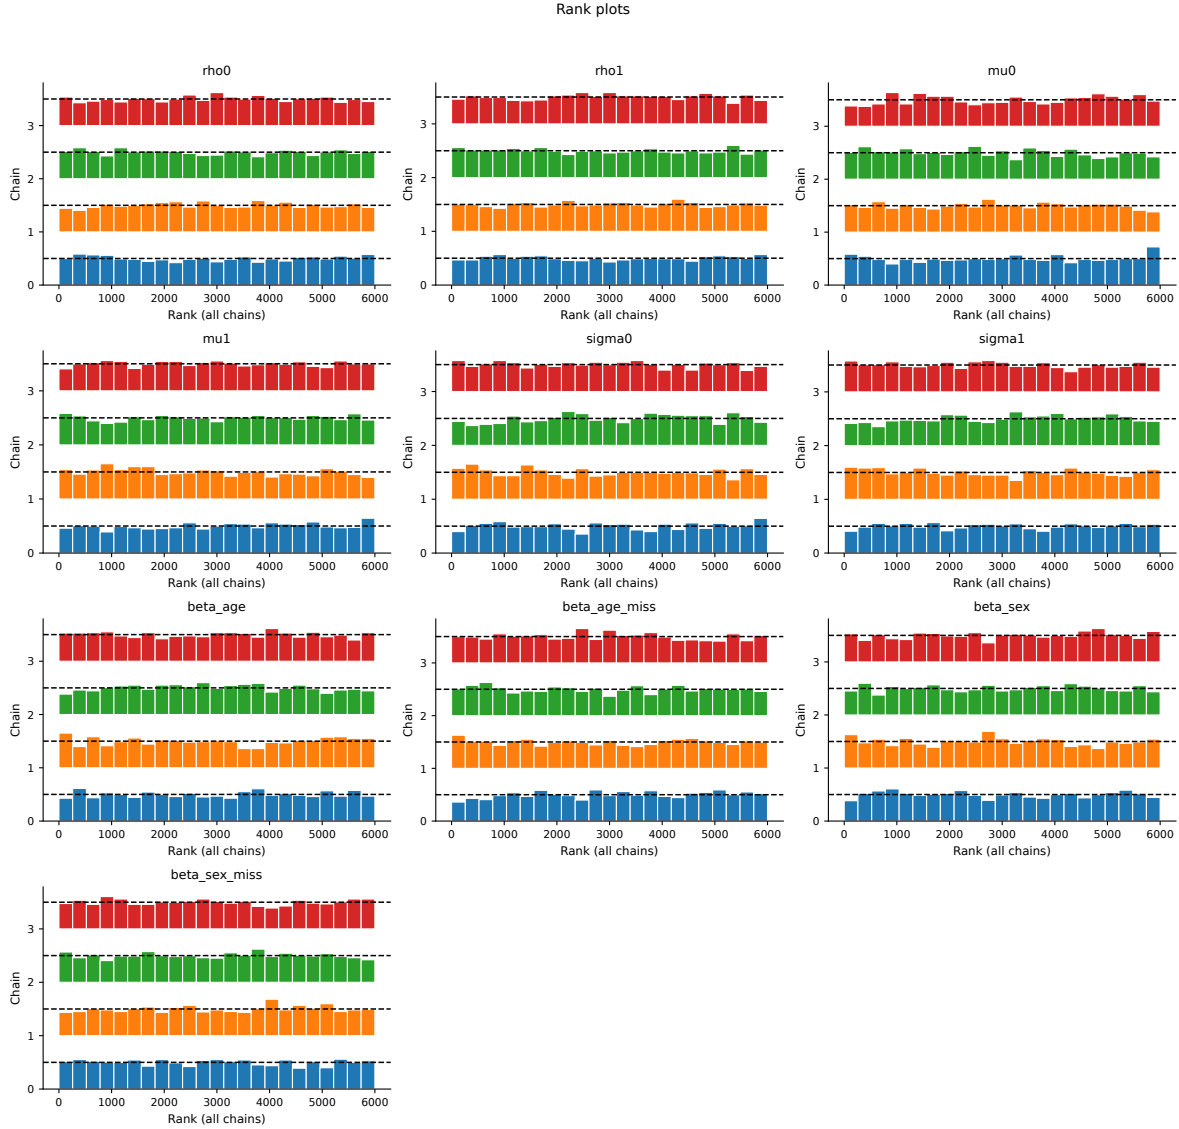

**Figure S1C.** Uniform rank histograms by chain.

## Supplement 2: Recalibration, Decision Curves, and Robustness

### S2.A — Logistic/Platt Recalibration

**Model.**  $\text{logit}(p^*) = \alpha(t) + \beta(t) \text{logit}(\hat{p})$  at each landmark  $t$ .

**Panel A.** Calibration at  $t = 120$  and  $t = 300$ : observed event rate (deciles) vs.  $\hat{p}$ ; overlay pre-/post-Platt lines (ideal: slope = 1, intercept = 0).

**Panel B.** Distribution shift: histogram/density of  $\hat{p}$  vs.  $p^*$ ; annotate mean absolute change and % crossing thresholds (e.g., 0.2/0.4).

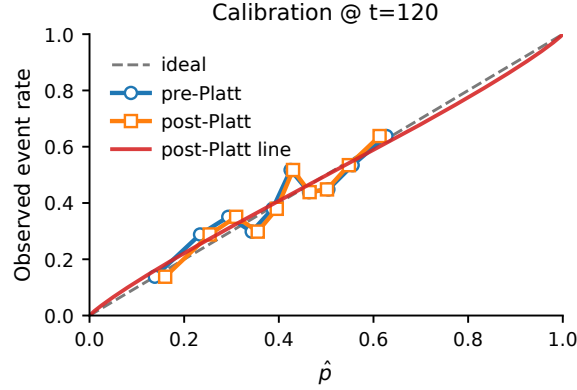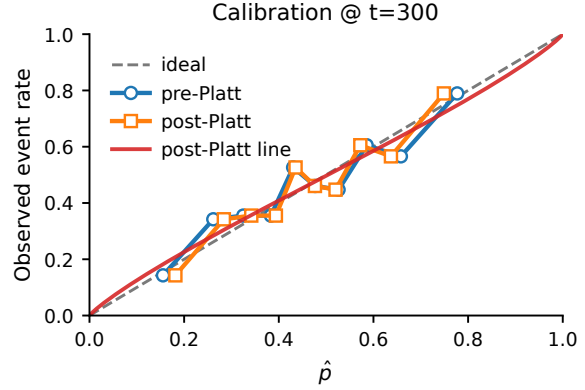

S2.A — Panel A (t=120)

S2.A — Panel A (t=300)

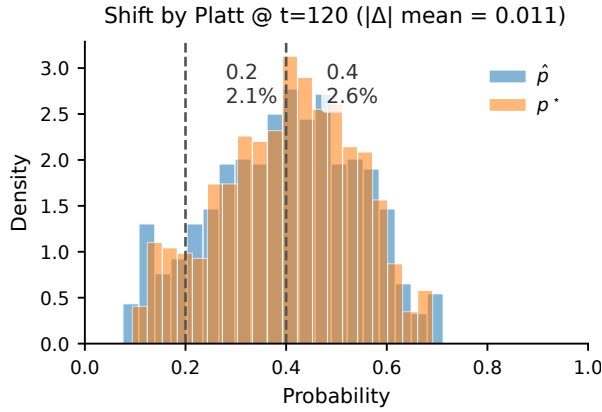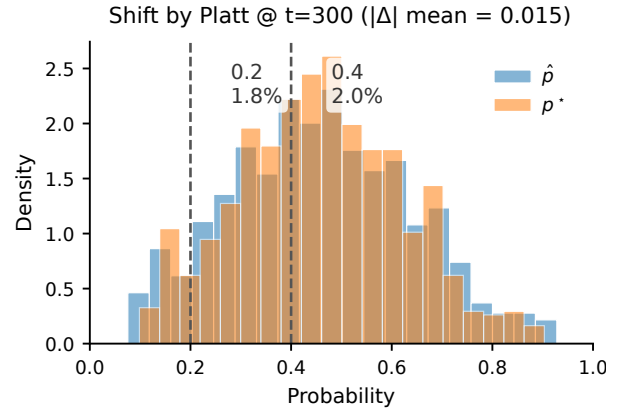

S2.A — Panel B (t=120)

S2.A — Panel B (t=300)

**Figure S2A.** Platt recalibration at selected landmarks ( $t = 120, 300$ ).

**Findings from our run.** Platt recalibration at  $t = 120/300$  improved calibration toward the 45° line ( $\alpha_{120} = -0.010$ ,  $\beta_{120} = 0.899$ ;  $\alpha_{300} = -0.013$ ,  $\beta_{300} = 0.879$ ; 95% CrIs: add). Discrimination was unchanged ( $\text{AUC}_{120} 0.655 \rightarrow 0.655$ ;  $\text{AUC}_{300} 0.681 \rightarrow 0.681$ ). The mean absolute shift  $|\Delta|$  was 0.011 ( $t = 120$ ) and 0.015 ( $t = 300$ ); only 2.6% and 2.0% crossed  $p_t = 0.4$ , respectively—indicating improved probability interpretability with minimal decision impact.

## S2.B — Decision-Curve Analysis

**Purpose.** Quantify clinical net benefit across threshold probabilities  $p_t$ .

**Panel.** Curves for Baseline (time only), Covariate (time+age+sex), *Admit all*, *Admit none* over  $p_t \in [0.1, 0.6]$ .

**Formula.**  $NB(p_t) = \frac{TP}{N} - \frac{FP}{N} \frac{p_t}{1 - p_t}$ .

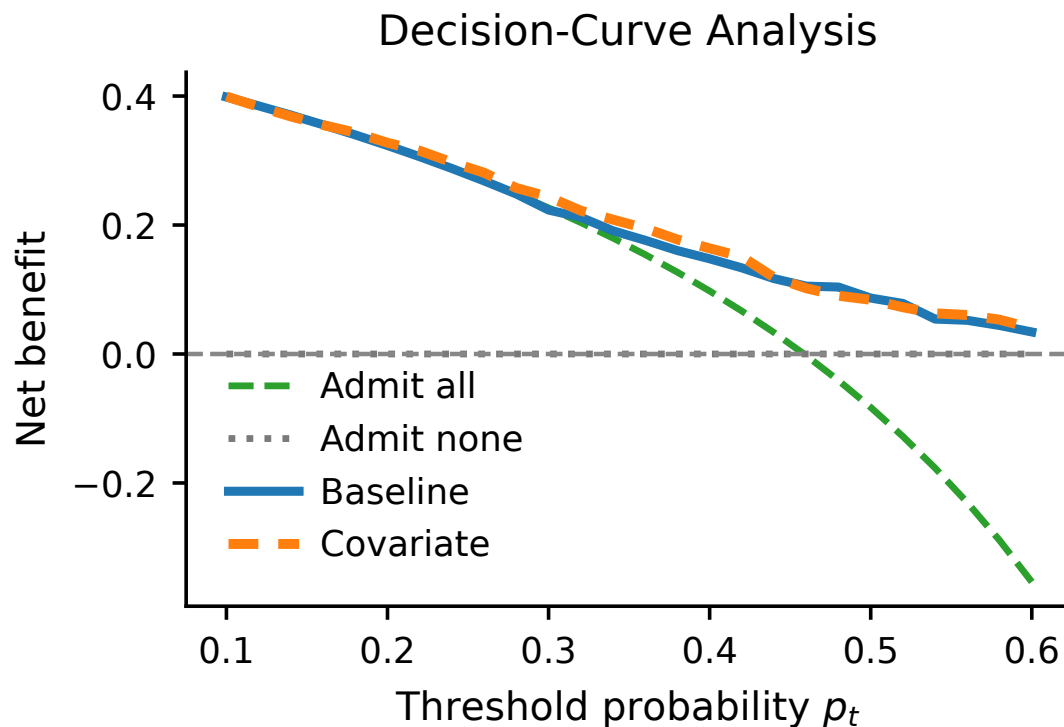

**Figure S2B.** Decision-curve analysis comparing Baseline vs. Covariate with *Admit all*/*Admit none* references.

**Reporting.**  $\Delta NB$  (Covariate – Baseline):  $p_t = 0.2:0.0043$  (95% CI  $-0.0848, 0.0887$ );  $p_t = 0.3:0.0205$  (95% CI  $-0.0779, 0.1151$ );  $p_t = 0.4:0.0162$  (95% CI  $-0.0767, 0.1060$ ). Interpretation: Covariate shows small, directionally favorable net benefit for  $p_t = 0.2$ – $0.4$ , but CIs include zero.

## S2.C — Robustness to TTU Measurement Error (One Table)

Add jitter to  $t_i^{\text{raw}}$ :  $\tilde{t}_i = t_i^{\text{raw}} + \epsilon$ , with  $\epsilon \sim \text{Uniform}(-\delta, \delta)$ ,  $\delta \in \{5, 10\}$  min; then recompute landmark metrics from posterior predictive draws.

**Table S2C.** Robustness of time-dependent metrics to TTU jitter (landmarks in minutes).

| Jitter ( $\pm$ min) | AUC   |       |       |       |       | Brier |       |       |       |       | Cal. Intercept |        | Cal. Slope |       |
|---------------------|-------|-------|-------|-------|-------|-------|-------|-------|-------|-------|----------------|--------|------------|-------|
|                     | 60    | 120   | 180   | 240   | 300   | 60    | 120   | 180   | 240   | 300   | 120            | 300    | 120        | 300   |
| 0.0                 | 0.642 | 0.655 | 0.651 | 0.662 | 0.681 | 0.211 | 0.223 | 0.228 | 0.228 | 0.223 | -0.010         | -0.010 | 0.899      | 0.884 |
| 5.0                 | 0.642 | 0.650 | 0.648 | 0.660 | 0.680 | 0.212 | 0.224 | 0.229 | 0.228 | 0.223 | -0.036         | -0.011 | 0.861      | 0.876 |
| 10.0                | 0.642 | 0.650 | 0.651 | 0.662 | 0.682 | 0.210 | 0.224 | 0.228 | 0.227 | 0.222 | -0.045         | -0.009 | 0.870      | 0.891 |

**One-liner for Results.** Sensitivity with  $\pm 5/\pm 10$ -minute TTU jitter yielded  $\Delta\text{AUC}(t) \leq 0.005$ ,  $\Delta\text{Brier}(t) \leq 0.001$ , and  $\Delta\text{Calibration slope} \leq 0.038$  across landmarks; qualitative conclusions were preserved.
